# Supplementary material for: A questionnaire development to assess the social representation of nurses in the Basque Country: a psychometric assessment
Source: PeerJ. 2022 Sep 23;10:e13903. doi: 10.7717/peerj.13903 (PMC9512000; doi:10.7717/peerj.13903)
Supplement: Supplemental Information 2 [file peerj-10-13903-s002.xlsx]

## Sheet: Answers
Temporary marking	Gender	date of birth	previous studies	Current academic year	Have you been cared for by a nurse in the last two years?	Is someone close to you a nurse?	If you answered yes to the previous question, please specify who:	Has anyone in your immediate environment been cared for by nurses in the last two years?	If you answered yes to the previous question, please specify who:	01. Nursing is a university degree in Spain	02. Nurses can access postgraduate studies (for example: master's degree, university expert...).	03. Nurses have access to doctoral studies.	04. Nurses have access to specialities through a selective process at state level (EIR).	05a. Do you consider the following areas to be nursing specialities: MENTAL HEALTH NURSING	05b. Do you consider the following areas to be nursing specialities: PEDIATRIC NURSING	05c. Do you consider the following areas to be nursing specialities: FAMILY AND COMMUNITY NURSING	05d. Do you consider the following areas to be nursing specialities: OCCUPATIONAL HEALTH NURSING	05e. You consider the following areas to be nursing specialities: GERIATRIC NURSING	05f. Do you consider the following to be nursing specialties: MATRON	05g. Do you consider the following areas to be nursing specialities: MEDICAL-CHIRGICAL CARE NURSING	05h. You consider the following areas to be nursing specialities: EMERGENCY AND URGENCY NURSING	05i. Do you consider the following areas to be nursing specialties: INTENSIVE CARE NURSING	06. Nursing is a profession that can be practised by both men and women.	07. The social visibility of nurses is independent of the gender of their professionals.	08. There are proportionally more male nurses than female nurses in positions of responsibility.	09. There are proportionally more men than women in teaching and research positions in health care	10. Nurses have autonomy in decision-making in nursing care.	11. Nurses are competent to detect or diagnose health problems and care needs of the individual.	12. Nurses can independently treat minor illnesses of a self-limiting nature.	13. Nurses are able to independently prescribe over-the-counter medicines.	14. Nurses also work in coordination with other members of the health team to respond to the needs of patients.	15. Nursing assistants (i.e. nurses who provide direct care to people) perform managerial and administrative tasks in their daily clinical practice.	16. Any trained health professional should be able to have access to a senior management position within an institution (e.g., management of a health organisation, health councils...) regardless of their profession.	17. Any trained health professional should be able to participate in the development of health policies at any state level, regardless of whether they are male or female.	18. The nursing profession is eminently scientific.	19. Research is part of the competencies of nurses.	20. Journals focused on care are recognised for their prestige among scientific publications (impact factor).	21. The results of research carried out by nurses aim to improve the health of individuals and their communities.	22. The results of research conducted by nurses can promote the development of health policies.	23. The results of research conducted by nurses can contribute to the sustainability of the healthcare system.	24. The research carried out by nurses include the field of healthcare.	25. The research carried out by nurses include public health problems.	26. The research carried out by nurses include gender inequalities and social determinants of health.	27. Nurses can carry out research into many possible fields of research.	28. Nurse educators develop their competence at university level.	29. Nurses can become university lecturers.	30. Nurses develop teaching competencies in clinical settings.	31. Nurses engage with the media as health educators and communicators.	32. Nurses are visible in social networks as disseminators and educators in health matters.
2020-11-09 16:45:09	Female	1995-05-04	Other degree or equivalent studies	4º	No	Yes	Close friend	Yes	Aunts, uncles or other relatives	Yes	Yes	Yes	Yes	I don´t know	Yes	Yes	Yes	Yes	No	Yes	Yes	Yes	5	1	2	4	4	4	4	0	5	4	3	5	3	3	1	4	4	4	4	4	3	4	4	4	4	0	0
2020-11-09 17:59:54	Female	1999-11-07	High School	4º	Yes	Yes	Close friend	Yes	Parent or grandparents	Yes	Yes	Yes	Yes	I don´t know		I don´t know	I don´t know	I don´t know	I don´t know	I don´t know	I don´t know	I don´t know	5	5	4	3	3	2	4	0	4	5	4	4	3	2	2	2	2	3	3	3	3	3	3	5	3	1	2
2020-11-09 18:13:39	Male	1998-10-16	High School	4º	Yes	Yes	Close friend	Yes	Parent or grandparents	Yes	Yes	Yes	Yes	Yes	Yes	Yes	No	Yes	Yes	No	Yes	No	5	0	0	0	2	0	0	0	5	5	5	5	1	1	4	5	1	5	5	5	5	5	5	4	2	1	4
2020-11-09 18:13:47	Male	1998-05-10	High School	4º	Yes	Yes	Aunts, uncles or other relatives	No		Yes	Yes	Yes	I don´t know	Yes	Yes	Yes	No	I don´t know	Yes	Yes	Yes	Yes	5	3	2	3	3	5	5	1	3	2	5	5	5	3	3	5	5	5	5	5	3	5	3	5	5	1	2
2020-11-09 18:13:55	Male	1999-09-29	High School	4º	Yes	No		Yes	Parent or grandparents	Yes	Yes	Yes	No	Yes	No	I don´t know	No	Yes	Yes	No	No	I don´t know	5	5	3	4	4	3	4	2	2	3	5	5	5	4	4	3	4	4	4	4	3	3	0	5	5	4	3
2020-11-09 18:14:10	Female	1999-04-29	High School	4º	No	Yes	Aunts, uncles or other relatives	Yes	Parent or grandparents	Yes	Yes	Yes	Yes	Yes	Yes	Yes	Yes	Yes	Yes	I don´t know	I don´t know	I don´t know	5	4	2	3	2	2	4	1	5	4	4	5	3	5	3	3	4	5	5	5	4	5	4	5	4	5	4
2020-11-09 18:14:25	Male	1999-03-24	High School	4º	Yes	No		Yes	Close friend	Yes	Yes	Yes	I don´t know	I don´t know	I don´t know	I don´t know	I don´t know	I don´t know	I don´t know	I don´t know	I don´t know	I don´t know	5	0	4	3	3	3	3	3	3	3	3	3	3	3	3	3	3	3	3	3	3	3	3	3	3	3	3
2020-11-09 18:14:46	Male	1999-01-22	High School	4º	Yes	Yes	Aunts, uncles or other relatives	Yes	Parent or grandparents	No	Yes	Yes	No	No	No	No	No	Yes	Yes	Yes	No	Yes	5	0	5	5	0	2	0	3	5	5	3	4	5	4	2	5	5	5	5	5	5	2	5	5	3	0	0
2020-11-09 18:14:48	Female	12/11/0099	High School	4º	Yes	No		Yes	Parent or grandparents	Yes	Yes	Yes	Yes	No	Yes	No	No	No	Yes	Yes	No	No	5	2	5	3	2	2	2	0	4	2	2	5	3	3	3	2	4	3	2	2	4	4	4	4	2	4	4
2020-11-09 18:14:59	Male	1997-12-26	Professional training	4º	Yes	Yes	Close friend	Yes	Parent or grandparents, Tíos o resto de familiares	Yes	Yes	Yes	I don´t know	I don´t know	Yes	I don´t know	I don´t know	Yes	Yes	Yes	I don´t know	Yes	5	4	3	3	3	3	3	0	3	2	3	3	3	1	2	3	3	3	2	3	2	3	1	4	4	0	1
2020-11-09 18:15:01	Female	1998-01-25	High School	4º	Yes	Yes	Aunts, uncles or other relatives	Yes	Parent or grandparents	Yes	Yes	I don´t know	I don´t know	Yes	Yes	I don´t know	No	Yes	No	Yes	Yes	Yes	5	1	3	3	2	3	4	0	5	3	5	5	2	5	3	5	5	5	5	5	5	5	3	5	5	4	4
2020-11-09 18:15:15	Female	1997-08-17	High School	4º	Yes	No		Yes	Parent or grandparents, Hermano/a, Aunts, uncles or other relatives	Yes	Yes	Yes	No	No	Yes	No	Yes	Yes	Yes	No	Yes	Yes	5	1	4	4	0	3	0	0	5	3	0	5	3	1	2	4	1	3	4	4	5	3	5	5	4	0	0
2020-11-09 18:15:25	Female	1998-02-14	High School	4º	Yes	Yes	Close friend	Yes	Parent or grandparents	Yes	Yes	Yes	Yes	Yes	Yes	Yes	Yes	Yes	Yes	Yes	Yes	Yes	5	5	2	2	4		5	4	5	5	5	5	5	5	5	5	5	5		5	5	5	5	5	5	5	5
2020-11-09 18:15:29	Female	1999-07-30	High School	4º	No	No		No		Yes	I don´t know	I don´t know		I don´t know	Yes	Yes	I don´t know	Yes	I don´t know	Yes	Yes	Yes	5	3	2	2	2	1	2	2	3	3	4		3	3	3	4	4	4	4	4	4	4	3	3	4	3	3
2020-11-09 18:15:51	Female	1999-09-21	High School	4º	Yes	Yes	Close friend	Yes	Parent or grandparents	Yes	Yes	Yes	Yes	Yes	Yes	Yes	Yes	Yes	I don´t know	Yes	Yes	Yes	5	1	4	4	2	3	4	4	4	2	4	4	5	5	3	4	4	4	4	3	4	5	4	4	3	0	0
2020-11-09 18:15:53	Male	1998-07-10	Other degree or equivalent studies	4º	No	Yes	Aunts, uncles or other relatives	Yes	Parent or grandparents, Hermano/a, Aunts, uncles or other relatives	Yes	Yes	Yes	Yes	No	Yes	Yes	Yes	Yes	Yes	Yes	Yes	Yes	5	4	1	2	3	4	5	4	5	4	2	3	3	3	3	4	5	5	5	5	3	5	3	5	3	4	4
2020-11-09 18:15:58	Male	1998-11-16	High School	4º	Yes	No		Yes	Parent or grandparents, Hermano/a	Yes	Yes	I don´t know	I don´t know	Yes	Yes	Yes	No	Yes	Yes	Yes	Yes	No	5	0	4	4	2	5	5	3	4	4	3	5	3	0	0	4	4	4	2	3	3	4	4	3	2	1	1
2020-11-09 18:16:05	Female	1999-06-14	High School	4º	Yes	Yes	Aunts, uncles or other relatives	Yes	Aunts, uncles or other relatives	Yes	Yes	Yes	Yes	No	Yes	No	No	Yes	Yes	No	Yes	Yes	5	5	4	4	1	2	2	1	4	4	4	4	3	3	4	4	3	3	3	3	4	4	4	1	1	1	1
2020-11-09 18:16:25	Female	1999-04-30	High School	4º	Yes	Yes	Aunts, uncles or other relatives	Yes	Aunts, uncles or other relatives	Yes	Yes	Yes	Yes	Yes	Yes	Yes	Yes	Yes	Yes	Yes	Yes	Yes	5	3	1	2	1	1	5	0	3	3	4	5	2	5	3	4	4	3	4	5	4	4	2	5	3	1	2
2020-11-09 18:16:41	Female	1997-02-23	High School	4º	Yes	Yes	Aunts, uncles or other relatives	Yes	Parent or grandparents, Aunts, uncles or other relatives	Yes	Yes	I don´t know	I don´t know	I don´t know	Yes	I don´t know	I don´t know	Yes	I don´t know	I don´t know	I don´t know	I don´t know	5	1	0	2	2	5	5	1	3	3	5	5	5	3	2	4	3	3	3	3	3	4	2	5	4	2	2
2020-11-09 18:16:48	Male	1984-11-06	Other degree or equivalent studies	4º	Yes	Yes	Close friend	Yes	Pareja	Yes	Yes	Yes	I don´t know	Yes	Yes	Yes	Yes	Yes	Yes	Yes	Yes	Yes	5	1	4	4	3	4	4	2	5	4	4	5	4	5	4	5	5	3	4	5	5	5	5	5	4	3	3
2020-11-09 18:16:52	Male	1995-04-22	Professional training	4º	Yes	No		Yes	Aunts, uncles or other relatives	Yes	Yes	Yes	Yes	Yes	Yes	Yes	Yes	Yes	Yes	Yes	Yes	Yes	5	2	0	0	0	0	0	0	2	3	0	0	0	0	3	3	0	0	2	2	2	3	0	5	3	0	0
2020-11-09 18:17:06	Female	1999-03-21	High School	4º	Yes	Yes	Close friend	Yes	Parent or grandparents, Hermano/a, Aunts, uncles or other relatives	Yes	I don´t know	I don´t know	Yes	Yes	Yes	Yes	Yes	Yes	Yes	Yes	Yes	Yes	5	4	3	3	3	5	5	1	5	5	2	0	3	5	4	3	2	4	5	5	5	5	0	0	0	0	0
2020-11-09 18:17:17	Male	1997-03-11	High School	4º	Yes	No		Yes	Parent or grandparents	Yes	I don´t know	No	No	Yes	No	I don´t know	I don´t know	Yes	I don´t know	Yes	Yes	Yes	5	0	0	3	0	0	2	0	3	4	0	0	2	3	5	5	5		5	5	2	2	3	4	4	0	0
2020-11-09 18:17:19	Male	2000-01-29	High School	4º	Yes	Yes	Close friend	No		Yes	Yes	Yes	Yes	No	Yes	Yes	No	No	No	Yes	No	Yes	5	5	5	5	3	3	4	4	5	5	5	5	3	4	1	5	5	5	5	5	4	5	4	5	4	3	4
2020-11-09 18:17:38	Female	1998-08-13	High School	4º	Yes	Yes	Close friend	Yes	Parent or grandparents, Close friend	Yes	Yes	No	Yes	Yes	Yes	I don´t know	I don´t know	Yes	Yes	I don´t know	Yes	Yes	5	3	3	2	1	4	3	1	5	2	3	5	4	4	3	4	4	4	4	5	5	5	2	4	5	3	4
2020-11-09 18:17:41	Male	1996-11-26	High School	4º	Yes	Yes	Parent or grandparents	Yes	Parent or grandparents, Hermano/a, Aunts, uncles or other relatives	Yes	No	I don´t know	Yes	Yes	Yes	Yes	Yes	Yes	Yes	Yes	Yes	Yes	5	1	1	4	2	5	4	2	5	5	0	3	4	4	4	5	5	5	4	4	3	5	4	5	5	4	5
2020-11-09 18:17:56	Male	1998-11-03	High School	4º	Yes	Yes	Parent or grandparents	Yes	Parent or grandparents, Aunts, uncles or other relatives	Yes	No	Yes	Yes	Yes	Yes	No	Yes	Yes	Yes	Yes	No	Yes	5	1	4	4	2	1	4	1	5	4	0	0	1	3	1	3	3	3	4	4	1	4	1	1	3	0	2
2020-11-09 18:18:14	Female	1999-04-16	High School	4º	No	Yes	Close friend	Yes	Parent or grandparents, Aunts, uncles or other relatives	Yes	Yes	I don´t know	I don´t know	Yes	Yes	Yes	I don´t know	Yes	Yes	Yes	Yes	Yes	5	1	4	4	3	4	4	5	5	3	5	5	3	3	3	5	5	5	5	4	3	4	3	5	3	3	1
2020-11-09 18:18:21	Male	1998-02-25	High School	4º	Yes	No		Yes	Parent or grandparents, Hermano/a, Close friend	Yes	Yes	Yes	I don´t know	No	Yes	I don´t know	I don´t know	I don´t know	Yes	Yes	Yes	Yes	5	4	3	3	3	4	3	4	5	3	3	3	4	2	4	4	3	4	3	4	4	3	1	4	4	1	4
2020-11-09 18:18:21	Male	1999-05-14	High School	4º	Yes	Yes	Parent or grandparents	Yes	Parent or grandparents, Aunts, uncles or other relatives	Yes	I don´t know	I don´t know	I don´t know	I don´t know	Yes	Yes	I don´t know	Yes	Yes	Yes	Yes	Yes	5	5	0	0	3															3		3	3	5	3	2	4
2020-11-09 18:19:05	Female	1996-01-31	Other degree or equivalent studies	4º	Yes	Yes	Aunts, uncles or other relatives	Yes	Aunts, uncles or other relatives	Yes	Yes	I don´t know	I don´t know	Yes	Yes	Yes	Yes	Yes	Yes	Yes	No	I don´t know	5	5	2	2	1	3	4	0	3	4	4	5	3	5	3	5	5	5	4	5	5	5	4	3	3	3	4
2020-11-09 18:19:17	Female	1999-03-31	High School	4º	Yes	No		Yes	Hermano/a, Aunts, uncles or other relatives	Yes	Yes	I don´t know	Yes	Yes	Yes	Yes	Yes	Yes	Yes	Yes	Yes	Yes	5	5	2	2	1	3	3	2	4	4	2	2	3	2	1	2	3	3	3	3	3	2	3	4	3	1	1
2020-11-09 18:19:31	Male	1998-03-31	High School	4º	Yes	Yes	Parent or grandparents	Yes	Parent or grandparents, Hermano/a, Tíos o resto de familiares	Yes	Yes	Yes	Yes	Yes	Yes	Yes	Yes	Yes	Yes	Yes	Yes	Yes	5	5	2	3	4	5	5	1	5	2	3	5	4	4	4	4	4	4	4	4	3	4	4	4	4	4	5
2020-11-09 18:19:55	Female	1999-11-12	High School	4º	Yes	Yes	Close friend	Yes	Parent or grandparents, Hermano/a	Yes	Yes	Yes	Yes	Yes	Yes	Yes	No	Yes	Yes	No	No	Yes	5	3	1	3	4	4	2	2	5	5	3	5	3	4	4	4	5	4	3	4	5	5	5	5	4	1	5
2020-11-09 18:20:02	Male	1998-04-02	High School	4º	Yes	Yes	Aunts, uncles or other relatives	Yes	Parent or grandparents, Tíos o resto de familiares	Yes	Yes	Yes	Yes	Yes	Yes	Yes	Yes	Yes	No	Yes	No	No	5	5	4	5	4	5	5	5	5	4	4	4	5	5	4	5	5	4	4	5	5	4	5	5	5	4	5
2020-11-09 18:20:55	Female	2020-09-25	High School	4º	Yes	No		Yes	Parent or grandparents, Hermano/a, Aunts, uncles or other relatives	Yes	I don´t know	I don´t know	Yes	No	Yes	Yes	Yes	Yes	Yes	No	Yes	Yes	5	3	3	2	2	4	5	4	5	4	4	5	3	3	2	4	5	5	4	5	5	5	4	4	3	4	3
2020-11-09 18:21:01	Female	1998-08-20	High School	4º	Yes	No		Yes	Parent or grandparents	Yes	I don´t know	Yes	I don´t know	No	No	No	No	No	No	No	Yes	Yes	5	0		1	4	4	5	4	5	1	4	5	5	1	3	5	5	5	5	5	5	5	1	5	4	3	5
2020-11-09 18:21:43	Female	1999-09-23	High School	4º	Yes	Yes	Brother	Yes	Brother	Yes	Yes	Yes	Yes	Yes	Yes	Yes	Yes	Yes	Yes	Yes	Yes	Yes	5	0	2	3	2	5	5	0	5	2	5	5	2	5	2	5	5	5	5	5	5	5	5	5	5	1	3
2020-11-09 18:22:29	Female	1998-04-05	High School	4º	Yes	Yes	Close friend	Yes	Brother	Yes	Yes	Yes	Yes	Yes	Yes	Yes	Yes	Yes	Yes	Yes	Yes	Yes	5	2	4	1	3	3	2	0	5	4	4	5	5	5	5	5	5	5	5	5	5	5	5	5	5	5	3
2020-11-09 18:22:47	Male	1999-05-19	High School	4º	Yes	Yes	Close friend	Yes	Parent or grandparents	Yes	Yes	I don´t know	Yes	Yes	Yes	Yes	Yes	Yes	Yes	Yes	Yes	Yes	5	4	3	4	4	5	4	3	4	2	3	4	1	2	4	4	4	5	4	4	3	4	3	2	4	4	4
2020-11-09 18:23:20	Male	1998-10-28	High School	4º	Yes	Yes	Aunts, uncles or other relatives	Yes	Close friend	Yes	Yes	Yes	I don´t know	I don´t know	I don´t know	I don´t know	I don´t know	I don´t know	I don´t know	I don´t know	I don´t know	I don´t know	5	5	5	5	5	5	5	5	5	5	5	5	5	5	5	5	5	5	5	5	5	5	5	5	5	5	5
2020-11-09 18:23:28	Female	1999-08-07	High School	4º	Yes	No		Yes	Parent or grandparents, Close friend	Yes	Yes	I don´t know	I don´t know	Yes	Yes	Yes	Yes	Yes	Yes	Yes	Yes	Yes	5	2	3	5	1	4	1	0	4	1	5	5	2	1	2	4	4	4	2	4	4	4	2	4	3	0	0
2020-11-09 18:23:40	Female	1995-10-15	High School	4º	Yes	Yes	Brother	Yes	Parent or grandparents, Close friend	Yes	Yes	Yes	Yes	Yes	Yes	Yes	Yes	Yes	Yes	No	No	No	5	2	0	0	4	5	5	5	5	5	5	5	5	5	3	5	5	5	5	5	5	5	5	5	5	2	5
2020-11-09 18:25:29	Male	1999-04-10	High School	4º	Yes	No		Yes	Parent or grandparents	Yes	Yes	Yes	Yes	No	No	No	No	Yes	Yes	No	Yes	No	5	1	4	1	4	5	4	5	5	1	0	5	1	5	0	5	5	5	5	5	5	5	4	5	5	3	4
2020-11-09 18:25:49	Male	1999-11-22	High School	4º	Yes	Yes	Close friend	Yes	Parent or grandparents	Yes	I don´t know	I don´t know	Yes	Yes	Yes	No	Yes	Yes	Yes	No	Yes	Yes	5	5	1	1	1	1	5	1	5	4	1	5	4	1	2	5	5	5	4	4
2020-11-09 18:26:32	Male	1997-10-06	High School	4º	Yes	Yes	Close friend	Yes	Parent or grandparents, Tíos o resto de familiares	Yes	Yes	Yes	No	Yes	Yes	Yes	Yes	Yes	Yes	I don´t know	Yes	I don´t know	5	3	3	4	2	3	3	3	3	3	4	3	3	4	2	4	4	4	3	3	3	3	4	4	3	3	2
2020-11-09 18:26:54	Male	1999-03-02	High School	4º	Yes	No		Yes	Parent or grandparents	Yes	I don´t know	I don´t know	Yes	Yes	Yes	Yes	Yes	Yes	Yes	Yes	Yes	Yes	4	2	3	3	2	1	3	2	4	2	1	5	2	2	3	5	4	4	3	4	3	2	4	3	5	4	3
2020-11-09 18:29:56	Female	1998-07-13	High School	4º	Yes	Yes	Parent or grandparents	Yes	Parent or grandparents	Yes	I don´t know	Yes	I don´t know	I don´t know	I don´t know	I don´t know	I don´t know	Yes	Yes	I don´t know	Yes	Yes	5	4	2	2	2	3	3	2	4	2	4	4	3	3	2	3	2	3	4	3	3	3	2	4	2	2	2
2020-11-09 18:39:30	Male	1999-11-12	High School	4º	Yes	Yes	Close friend	Yes	Parent or grandparents	Yes	Yes	I don´t know	I don´t know	Yes	Yes	No	Yes	Yes	No	Yes	Yes	Yes	5	5	0	4	2	1	2	1	5	4	1	5	0	3	4	4	4	4	2	3	4	4	0	5	5	4	4
2020-11-09 18:44:03	Male	1999-08-18	High School	4º	No	No		Yes	Aunts, uncles or other relatives	Yes	Yes	Yes	Yes	No	Yes	Yes	Yes	Yes	Yes	Yes	Yes	Yes	5	5	5	5	4	5	5	4	4	5	4
2020-11-09 18:45:28	Female	1999-05-10	High School	3º	No	Yes	Aunts, uncles or other relatives	Yes	Parent or grandparents	Yes	Yes	Yes	Yes	No	Yes	I don´t know	I don´t know	Yes	Yes	Yes	Yes	Yes	5	5	3	3	2	3	2	2	4	5	1	5	3	4	4	4	4	5	5	3	4	4	4	4	3	2	3
2020-11-09 18:50:04	Female	1998-01-25	High School	4º	Yes	Yes	Aunts, uncles or other relatives	Yes	Parent or grandparents	Yes	Yes	I don´t know	I don´t know	Yes	Yes	I don´t know	No	Yes	No	Yes	Yes	Yes	5	1	3	3	2	3	4	0	5	3	5	5	2	5	3	5	5	5	5	5	5	5	3	5	5	4	4
2020-11-09 18:50:11	Female	1999-03-21	High School	4º	Yes	Yes	Close friend	Yes	Parent or grandparents, Hermano/a, Aunts, uncles or other relatives	Yes	I don´t know	I don´t know	Yes	Yes	Yes	Yes	Yes	Yes	Yes	Yes	Yes	Yes	5	4	3	3	3	5	5	1	5	5	2	0	3	5	4	3	2	4	5	5	5	5	0	0	0	0	0
2020-11-09 19:09:02	Female	1997-12-27	High School	4º	Yes	Yes	Aunts, uncles or other relatives	Yes	Parent or grandparents	Yes	Yes	Yes	Yes	I don´t know	Yes	I don´t know	I don´t know	Yes	Yes	Yes	Yes	Yes	5	3	5	3	3	5	4	5	5	2	5	5	3	5	4	5	4	3	4	3	3	5	4	5	5	3	1
2020-11-09 19:12:06	Female	1999-02-20	High School	4º	Yes	Yes	Aunts, uncles or other relatives	Yes	Parent or grandparents, Hermano/a, Aunts, uncles or other relatives	Yes	Yes	I don´t know	Yes	Yes	Yes	Yes	Yes	Yes	Yes	Yes	Yes	Yes	5	0	5	5	0	4	5	4	5	5	4	4	5	3	4	5	5	5	3	3	4	3	3	3	4	4	2
2020-11-09 19:12:07	Female	1996-03-24	Professional training	4º	Yes	Yes	Parent or grandparents	Yes	Parent or grandparents	Yes	Yes	Yes	Yes	I don´t know	Yes	Yes	I don´t know	Yes	Yes	Yes	Yes	Yes	5	5	2	4	5	5	5	3	5	5	5	5	3	5	4	4	5	5	5	5	5	5	5	5	5	5	5
2020-11-09 19:16:15	Male	1994-09-05	High School	4º	No	No		Yes	Brother	I don´t know	I don´t know	I don´t know	I don´t know	Yes	Yes	No	No	Yes	Yes	I don´t know	Yes	No	5	3	2	3	1	4	4	2	5	2	5	5	2	2	4	5	4	3	4	2	4	4	5	5	3	1	1
2020-11-09 19:54:45	Male	1998-04-29	High School	4º	No	Yes	Close friend	No		Yes	No	Yes	I don´t know	Yes	Yes	Yes	No	Yes	Yes	No	Yes	Yes	5	3	3	4	1	0	3	0	4	2	5	5	3	5	4	4	3	3	4	3	4	4	2	4	4	3	3
2020-11-23 20:17:16	Female	1999-08-04	High School	4º	Yes	No		Yes	Parent or grandparents, Hermano/a, Aunts, uncles or other relatives	Yes	Yes	Yes	Yes	I don´t know	Yes	I don´t know	No	I don´t know	Yes	Yes	Yes	Yes	5	5	0	0	5	5	5	5	5	5	3	5	4	5	1	5	5	5	5	5	5	5	3	5	5	3	4
2020-11-23 21:22:02	Female	1969-05-19	Other degree or equivalent studies	4º	Yes	No		Yes	Parent or grandparents	Yes	Yes	I don´t know	Yes	Yes	Yes	Yes	Yes	Yes	Yes	Yes	Yes	Yes	5	4	3	2	3	2	4	4	5	4	4	4	3	4	4	5	5	5	5	4	5	5	3	5	4	5	5
2020-11-24 09:36:07	Female	1999-09-02	High School	4º	Yes	Yes	Close friend	Yes	Parent or grandparents, Hermano/a, Aunts, uncles or other relatives	Yes	I don´t know	I don´t know	Yes	Yes	Yes	I don´t know	I don´t know		Yes	Yes	Yes	Yes	5	3	4	4	3	4	4	1	5	4	5	5	4	4	1	4	4	5	4	4	4	5	4	5	4	1	2
2020-11-24 11:28:36	Female	1999-08-15	Other degree or equivalent studies	4º	Yes	Yes	Close friend	Yes	Parent or grandparents	Yes	Yes	Yes	I don´t know	Yes	Yes	I don´t know	I don´t know	Yes	Yes	Yes	Yes	Yes	5	5	2	2	3	4	3	3	4	2	3	5	4	4	2	4	3	4	5	3	3	2	4	5	2	3	3
2020-11-24 15:14:11	Male	1999-01-29	High School	4º	Yes	Yes	Aunts, uncles or other relatives	Yes	Parent or grandparents	Yes	Yes	Yes	Yes	Yes	Yes	Yes	Yes	Yes	Yes	Yes	Yes	Yes	5	5	3	4	2	3	4	4	5	3	5	5	3	2	4	5	5	5	5	5	4	5	4	5	5	3	3
2020-11-24 15:14:27	Male	1999-11-09	High School	4º	Yes	No		Yes	Parent or grandparents	Yes	Yes	Yes	Yes	Yes	Yes	Yes	Yes	Yes	Yes	Yes	Yes	Yes	5	4	1	4	2	4	5	4	4	5	4	5	4	5	4	4	4	4	4	5	4	4	3	5	4	2	1
2020-11-24 15:15:37	Male	1998-12-20	High School	4º	Yes	No		Yes	Parent or grandparents	Yes	Yes	I don´t know	Yes	Yes	Yes	Yes	No	Yes	Yes	No	Yes	No	5	1	4	4	2	1	4	4	5	2	5	5	3	2	1	5	5	5	2	1	4	4	4	5	4	1	1
2020-11-24 15:16:05	Female	1999-10-11	High School	4º	Yes	Yes	Close friend	Yes	Close friend	Yes	Yes	Yes	Yes	I don´t know	I don´t know	I don´t know	I don´t know	I don´t know	Yes	Yes	Yes	Yes	5	5	2	3	3	1	3	3	5	5	4	2	4	3	3	2	4	4	2	2	3	4	3	4	4	2	3
2020-11-24 15:16:17	Female	1998-07-02	High School	4º	Yes	Yes	Close friend	Yes	Aunts, uncles or other relatives	Yes	Yes	Yes	Yes	Yes	Yes	Yes	Yes	Yes	Yes	Yes	Yes	Yes	5	4	3	3	4	4	4	2	5	4	4	5	4	4	3	5	5	5	5	5	5	5	5	5	5	3	4
2020-11-24 15:16:20	Male	1999-04-21	High School	4º	Yes	No		Yes	Parent or grandparents	Yes	Yes	Yes	Yes	Yes	Yes	Yes	Yes	Yes	Yes	No	No	Yes	5	1	1	2	1	2	5	2	5	3	2	5	4	2	3	4	3	4	3	3	2	2	3	5	2	1	1
2020-11-24 15:16:30	Male	1999-06-29	High School	4º	Yes	Yes	Close friend	Yes	Parent or grandparents, Tíos o resto de familiares, Abuela	Yes	Yes	Yes	I don´t know	Yes	Yes	Yes	I don´t know	Yes	Yes	Yes	Yes	Yes	5	5	2	2	3	4	3	3	4	2	5	3	4	4	3	4	4	3	3	4	3	4	4	5	5	4	3
2020-11-24 15:16:38	Male	1999-02-18	High School	4º	Yes	No		Yes	Close friend	Yes	Yes	Yes	I don´t know	Yes	Yes	No	No	Yes	Yes	Yes	No	No	5	1	4	1	2	4	1	3	4	3	4	5	3	2	4	4	4	4	4	4	2	3	2	4	4	4	3
2020-11-24 15:16:41	Male	1999-04-24	High School	4º	Yes	No		Yes	Parent or grandparents	Yes	Yes	Yes	Yes	Yes	I don´t know	I don´t know	I don´t know	I don´t know	I don´t know	I don´t know	Yes	Yes	5	5	2	2	4	3	5	3	5	2	4	4	5	3	3	3	3	3	3	3	2	4	4	5	4	2	1
2020-11-24 15:16:56	Female	1999-03-11	High School	4º	Yes	No	Close friend	Yes	Parent or grandparents, Aunts, uncles or other relatives	Yes	Yes	I don´t know	I don´t know	Yes	Yes	Yes	I don´t know	Yes	Yes	Yes	Yes	Yes	5	2	4	4	3	4	4	3	3	1	4	4	4	3	3	3	4	4	3	3	3	4	4	5	4	1	1
2020-11-24 15:17:10	Female	1999-07-02	Other degree or equivalent studies	4º	Yes	Yes	Aunts, uncles or other relatives	Yes	Parent or grandparents, Aunts, uncles or other relatives	Yes	Yes	Yes	I don´t know	No	Yes	Yes	No	Yes	Yes	Yes	Yes	Yes	5	3	2	3	5	1	1	3	3	3	3	4	2	4	2	4	3	3	3	3	2	2	2	4	3	4	4
2020-11-24 15:17:39	Male	1999-05-16	High School	4º	Yes	No		Yes	Parent or grandparents	Yes	Yes	Yes	I don´t know	I don´t know	Yes	Yes	No	Yes	No	I don´t know	Yes	Yes	5	5	5	2	5	3	1	5	1	5	3	5	2	5	5	5	5	5	5	2	0	5	5	5	3	5	5
2020-11-24 15:17:42	Male	1999-05-13	High School	4º	Yes	Yes	Parent or grandparents	Yes	Parent or grandparents	Yes	Yes	Yes	I don´t know	I don´t know	Yes	I don´t know	Yes	Yes	Yes	I don´t know	Yes	Yes	5	4	5	3	3	5	5	1	5	2	3	3	2	5	3	5	4	4		4	3	4	2	5	3	2	2
2020-11-24 15:17:57	Male	1999-02-24	High School	4º	Yes	Yes	Close friend	Yes	Parent or grandparents	Yes	Yes	Yes	I don´t know	No	Yes	Yes	Yes	Yes	Yes	I don´t know	I don´t know	Yes	5	5	2	3	3	4	4	4	4	2	4	5	4	5	4	5	5	5	4	4	3	4	4	5	4	1	1
2020-11-24 15:17:58	Female	1999-05-28	High School	4º	Yes	Yes	Close friend	Yes	Parent or grandparents	Yes	Yes	Yes	I don´t know	Yes	Yes	Yes	Yes	Yes	Yes	Yes	Yes	Yes	5	2	2	5	4	5	2	5	5	5	5	5		4	2	3	4	5	5	5	4	5	3	2	2	5	0
2020-11-24 15:18:04	Female	1999-08-31	High School	4º	Yes	No		Yes	Parent or grandparents, Hermano/a, Tíos o resto de familiares	Yes	Yes	I don´t know	I don´t know	No	Yes	I don´t know	I don´t know	Yes	Yes	Yes	I don´t know	Yes	5	5	3	2	2	4	4	3	5	3	3	5	4	4	4	4	5	4	4	4	4	4	3	5	4	3	4
2020-11-24 15:18:10	Female	1998-05-18	High School	4º	Yes	Yes	Close friend	Yes	Parent or grandparents, Hermano/a, Close friend	Yes	Yes	Yes	I don´t know	I don´t know	Yes	I don´t know	I don´t know	Yes	I don´t know	Yes	Yes	Yes	5	5	4	4	2	5	5	5	5	4	5	5	3	4	4	5	5	5	5	5	4	5	4	5	5	2	3
2020-11-24 15:18:10	Female	1999-12-02	High School	4º	No	No		Yes	Parent or grandparents, Tíos o resto de familiares	Yes	Yes	I don´t know	Yes	Yes	Yes	No	No	Yes	Yes	Yes	Yes	Yes	5	2	1	4	2	4	3	2	5	4	4	5	2	3	2	4	5	5	5	5	5	4	3	5	4	1	2
2020-11-24 15:18:17	Female	1999-05-15	High School	4º	No	Yes	Aunts, uncles or other relatives	No		Yes	I don´t know	I don´t know	I don´t know	I don´t know	I don´t know	I don´t know	I don´t know	I don´t know	I don´t know	I don´t know	I don´t know	I don´t know	5	0	3	2	3	1	3	2	4	0	5	5	2	2	4	3	3	3	3	3	3	3	3	3	3	2	2
2020-11-24 15:18:31	Male	1999-12-18	High School	4º	No	Yes	Aunts, uncles or other relatives	Yes	Parent or grandparents, Aunts, uncles or other relatives	Yes	Yes	Yes	I don´t know	Yes	Yes	Yes	No	Yes	Yes	Yes	Yes	Yes	5	2	0	0	2	5	5	3	5	2	2	5	1	5	2	5	5	5	5	5	5	5	3	5	5	5	5
2020-11-24 15:18:37	Male	1998-02-09	High School	4º	Yes	No		Yes	Parent or grandparents	Yes	Yes	I don´t know	I don´t know	No	Yes	I don´t know	I don´t know	Yes	Yes	I don´t know	Yes	Yes	5	2	2	3	2	4	4	3	5	3	3	5	5	3	2	5	4	4	4	5	4	2	2	4	3	2	2
2020-11-24 15:18:36	Female	1997-12-16	High School	4º	Yes	Yes	Close friend	Yes	Parent or grandparents	Yes	Yes	Yes	Yes	Yes	Yes	Yes	Yes	Yes	Yes	Yes	Yes	Yes	2	3	0	2	3	3	3	0	4	3	4	4	4	3	0	4	4	4	4	4	0	2	1	3	3	2	2
2020-11-24 15:18:39	Female	1999-09-06	High School	4º	Yes	Yes	Close friend	Yes	Parent or grandparents, Aunts, uncles or other relatives	Yes	Yes	Yes	Yes	Yes	Yes	I don´t know	I don´t know	Yes	Yes	Yes	Yes	Yes	5	0	1	1	4	4	3	5	5	5	4	5	5	4	2	5	5	5	5	5	4	4	5	3	3	5	5
2020-11-24 15:19:08	Male	1998-07-04	High School	4º	Yes	Yes	Close friend	Yes	Parent or grandparents, Hermano/a, Aunts, uncles or other relatives	Yes	I don´t know	I don´t know	Yes	Yes	Yes	Yes	Yes	Yes	Yes	Yes	Yes	Yes	5	3	3	2	3	4	4	2	5	4	5	5	3	3	3	4	4	4	3	5	5	5	5	5	5	2	2
2020-11-24 15:19:32	Female	1999-02-20	High School	4º	Yes	Yes	Close friend	Yes	Parent or grandparents, Aunts, uncles or other relatives	Yes	Yes	I don´t know	Yes	Yes	Yes	Yes	Yes	Yes	Yes	Yes	Yes	Yes	5	4	3	3	3	4	5	3	5	1	5	5	1		2	5	5	5	4	5	5	5	3	3	3	4	3
2020-11-24 15:19:42	Female	1999-04-05	High School	4º	Yes	Yes	Brother	Yes	Parent or grandparents, Hermano/a, Aunts, uncles or other relatives	Yes	Yes	Yes	I don´t know	Yes	Yes	Yes	Yes	Yes	Yes	Yes	Yes	Yes	5	1	3	3	5	5	4	4	5	4	4	5	1	5	4	4	5	5	5	5	5	5	4	4	4	2	3
2020-11-24 15:19:47	Male	1998-03-12	High School	4º	Yes	No		Yes	Parent or grandparents, Hermano/a	No	I don´t know	I don´t know	Yes	I don´t know	Yes	Yes	I don´t know	Yes	Yes	I don´t know	Yes	Yes	5	5		2	1	4	1	1	3	3	3	3	1	2	2	1	4	3	3	1	2	3	2	2	4	3	3
2020-11-24 15:19:55	Male	1999-02-12	High School	4º	Yes	Yes	Close friend	Yes	Parent or grandparents, Close friend	Yes	Yes	Yes	I don´t know	I don´t know	I don´t know	I don´t know	I don´t know	Yes	Yes	I don´t know	Yes	Yes	5	2	4	4	2	4	3	3	4	4	4	4	3	3	2	4	3	4	3	2	3	3	4	3	4	2	4
2020-11-24 15:19:57	Female	1999-03-26	High School	4º	Yes	Yes	Close friend	Yes	Parent or grandparents	Yes	Yes	I don´t know	I don´t know	Yes	Yes	Yes	Yes	Yes	Yes	I don´t know	Yes	Yes	5	3	2	5	0	4	4	1	4	1	1	5	4	1	1	4	3	3	3	3	5	3	1	5	2	0	0
2020-11-24 15:20:20	Male	1998-12-18	High School	4º	No	Yes	Close friend	Yes	Parent or grandparents	Yes	Yes	Yes	Yes	Yes	Yes	Yes	I don´t know	I don´t know	No	I don´t know	I don´t know	I don´t know	5	5	4	4	2	4	4	4	3	3	3	5	5	3	3	5	4	5	4	5	5	3	5	5	3	3	3
2020-11-24 15:20:30	Female	1999-10-06	High School	4º	Yes	Yes	Close friend	Yes	Parent or grandparents	Yes	Yes	Yes	Yes	I don´t know	Yes	I don´t know	I don´t know	Yes	Yes	I don´t know	Yes	Yes	5	2	3	3	2	4	5	3	5	4	4	2	4	4	4	4	3	3	3	3	4	5	4	5	4	2	2
2020-11-24 15:20:51	Male	1998-01-08	High School	4º	Yes	Yes	Close friend	Yes	Parent or grandparents, Hermano/a, Aunts, uncles or other relatives	Yes	Yes	Yes	Yes	No	Yes	Yes	Yes	Yes	Yes	Yes	Yes	Yes	5	1	1	1	1	1	2	4	5	4	5	5	1	3	1	4	4	3	4	4	1	2	4	3	4	1	1
2020-11-24 15:20:52	Female	1999-01-30	High School	4º	Yes	Yes	Aunts, uncles or other relatives	Yes	Parent or grandparents, Hermano/a, Aunts, uncles or other relatives	Yes	I don´t know	Yes	Yes	Yes	Yes	Yes	Yes	Yes	Yes	Yes	Yes	Yes	5	1	0	1	4	5	5	3	5	3	4	5	1	4	1	4	5	5	4	5	5	5	1	5	2	1	1
2020-11-24 15:20:59	Female	1999-06-28	High School	4º	Yes	No		Yes	Parent or grandparents	Yes	I don´t know	I don´t know	I don´t know	I don´t know	Yes	I don´t know	I don´t know	Yes	Yes	Yes	Yes	Yes	5	2	2	2	3	4	2	2	5	2	4	5	2	3	3	5	5	4	4	4	4	5	3	4	3	1	2
2020-11-24 15:21:03	Male	1999-04-12	High School	4º	Yes	No		Yes	Parent or grandparents, Aunts, uncles or other relatives	Yes	Yes	Yes	I don´t know	Yes	Yes	I don´t know	I don´t know	Yes	I don´t know	Yes	Yes	Yes	5	4	3	3	4	5	4	4	5	3	5	5	4	3	2	5	5	5	4	4	4	4	4	3	4	2	2
2020-11-24 15:21:11	Female	1999-12-17	High School	4º	Yes	Yes	Aunts, uncles or other relatives	Yes	Parent or grandparents, Hermano/a, Aunts, uncles or other relatives	Yes	Yes	I don´t know	I don´t know	Yes	No	No	I don´t know	Yes	Yes	No	No	I don´t know	4	1	0	3	3	4	3	3	5	3	1	1	2	2	3	3	3	3	3	2	2	5	3	1	4	3	3
2020-11-24 15:21:14	Female	1999-09-04	High School	4º	Yes	Yes	Aunts, uncles or other relatives	Yes	Parent or grandparents, Aunts, uncles or other relatives	Yes	Yes	Yes	Yes	Yes	Yes	Yes	Yes	Yes	Yes	Yes	Yes	Yes	5	2	3	3	5	5	4	4	5	5	5	5	3	4	3	5	5	5	4	5	4	5	1	4	4	2	5
2020-11-24 15:21:46	Female	1999-10-01	High School	4º	Yes	No		Yes	Parent or grandparents, Hermano/a, Aunts, uncles or other relatives	Yes	Yes	I don´t know	I don´t know	Yes	I don´t know	I don´t know	I don´t know	Yes	Yes	Yes	Yes	Yes	5	1	2	2	2	5	5	2	5	4	4	5	4	3	1	5	5	5	4	5	5	5	3	5	3	2	3
2020-11-24 15:21:52	Female	1999-07-14	High School	4º	Yes	Yes	Close friend	Yes	Parent or grandparents, Hermano/a	Yes	Yes	Yes	I don´t know	Yes	Yes	Yes	I don´t know	Yes	Yes	Yes	Yes	Yes	5	4	2	1	4	5	5	5	5	5	5	4	3	5	3	5	5	5	5	4	5	5	4	5	2	4	4
2020-11-24 15:22:55	Male	1999-02-14	High School	4º	Yes	Yes	Aunts, uncles or other relatives	Yes	Parent or grandparents, Tíos o resto de familiares	Yes	Yes	I don´t know	Yes	I don´t know	I don´t know	I don´t know	I don´t know	Yes	Yes	Yes	Yes	Yes	5	3	4	4	1	3	3	1	4	1	2	1	2	1	1	4	4	3	3	3	3	4	1	3	5	1	1
2020-11-24 15:25:06	Female	1999-04-24	High School	4º	Yes	Yes	Close friend	Yes	Parent or grandparents	Yes	Yes	I don´t know	I don´t know	Yes	Yes	Yes	I don´t know	Yes	Yes	Yes	Yes	Yes	5	3	4	3	4	1	4	0	4	4	5	5	3	4	3	4	4	4	4	4	4	4	2	3	4	1	1
2020-11-24 15:25:40	Female	1999-03-25	High School	4º	Yes	No		Yes	Parent or grandparents, Aunts, uncles or other relatives	Yes	Yes	Yes	I don´t know	I don´t know	I don´t know	I don´t know	I don´t know	I don´t know	I don´t know	I don´t know	I don´t know	I don´t know	5	2	1	1	2	5	5	2	5	4	3	5	3	4	3	4	5	5	3	3	3	4	3	5	5	3	5
2020-11-24 17:02:33	Female	1999-08-10	High School	4º	Yes	Yes	Close friend	Yes	Hospital nurses	Yes	Yes	I don´t know	I don´t know	I don´t know	I don´t know	Yes	I don´t know	I don´t know	Yes	I don´t know	Yes	Yes	5	3	2	3	2	1	2	3	4	3	3	5	3	2	2	4	4	4	3	4	5	4	5	5	4	3	3
2020-11-24 17:02:39	Female	1999-12-13	High School	4º	Yes	Yes	Close friend	Yes	Parent or grandparents, Hermano/a, Aunts, uncles or other relatives	Yes	I don´t know	I don´t know	I don´t know	Yes	Yes	Yes	Yes	Yes	Yes	Yes	Yes	Yes	5	5	4	4	3	4	5	5	5	5	5	5	3	3	3	5	5	5	5	5	3	5	3	5	3	2	2
2020-11-27 15:44:42	Male	2000-06-02	High School	3º	Yes	No		Yes	Brother	Yes	I don´t know	I don´t know	I don´t know	Yes	Yes	Yes	Yes	Yes	Yes	Yes	Yes	Yes	5	4	2	3	2	3	3	1	2	3	2	3	3	4	2	3	3	3	3	3	3	5	5	3	3	3	4
2020-11-27 15:44:43	Female	2000-01-25	High School	3º	Yes	Yes	Aunts, uncles or other relatives	Yes	Parent or grandparents, Aunts, uncles or other relatives	Yes	Yes	Yes	Yes	Yes	Yes	Yes	Yes	Yes	Yes	Yes	Yes	Yes	5	5	4	4	3	5	5	5	5	4	5	5	5	5	5	5		4	4	5	5	3	4	5	4	3	4
2020-11-27 15:46:09	Female	2000-05-05	High School	3º	Yes	Yes	Close friend	Yes	Parent or grandparents, Hermano/a, Aunts, uncles or other relatives	Yes	Yes	Yes	Yes	Yes	Yes	Yes	Yes	Yes	Yes	Yes	Yes	Yes	5	4	0	2	5	5	5	5	5	5	3	5	5	5	4	4	4	4	4	4	3	3	4	4	4	2	3
2020-11-27 15:46:20	Female	2000-10-07	High School	3º	Yes	Yes	Close friend	Yes	Parent or grandparents, Hermano/a, Aunts, uncles or other relatives	Yes	Yes	I don´t know	I don´t know	No	Yes	Yes	I don´t know	Yes	Yes	Yes	Yes	Yes	5	1	2	2	2	4	2	1	4	5	4	5	3	4	3	3	4	4	4	4	4	4	3	4	4	4	3
2020-11-27 15:46:25	Female	1995-05-09	High School	3º	Yes	Yes	Aunts, uncles or other relatives	Yes	Parent or grandparents	Yes	Yes	Yes	Yes	Yes	Yes	Yes	Yes	Yes	Yes	Yes	Yes	Yes	5	0	0	3	4	4	4	3	5	3	4	5	4	5	2	5	5	5	5	5	5	5	5	5	5	1	1
2020-11-27 15:47:08	Female	2020-02-07	High School	3º	No	No		Yes	Parent or grandparents, Tíos o resto de familiares	Yes	Yes	Yes	Yes	Yes	Yes	Yes	Yes	Yes	Yes	Yes	Yes	Yes	5	1	3	3	3	2	4	4	5	5	0	5	0	4	4	5	5	5	5	5	4	4	5	5	5	5	5
2020-11-27 15:47:08	Male	2000-04-11	High School	3º	Yes	Yes	Aunts, uncles or other relatives	Yes	Parent or grandparents, Hermano/a, Aunts, uncles or other relatives	Yes	Yes	Yes	Yes	Yes	Yes	Yes	No	Yes	Yes	Yes	Yes	Yes	5	3	4	4	4	1	4	0	5	4		5	5	5	4	5	4	3	4	1	4	4	0	4	1	4	3
2020-11-27 15:47:17	Female	2000-08-26	High School	3º	Yes	Yes	Aunts, uncles or other relatives	Yes	Brother	Yes	I don´t know	I don´t know	I don´t know	Yes	Yes	Yes	Yes	Yes	Yes	Yes	Yes	Yes	5	3	2	3	3	5	5	5	5	5	5	5	3	5	2	5	4	5	5	5	5	5	3	5	5	2	4
2020-11-27 15:48:24	Female	2000-03-04	High School	3º	Yes	Yes	Close friend	Yes	Parent or grandparents, Tíos o resto de familiares	Yes	Yes	Yes	Yes	Yes	Yes	No	Yes	Yes	Yes	Yes	No	No	5	3	5	0	3	3	5	3	5	4	5	5	5	4	2	4	4	4	4	4	4	3	5	5	4	1	1
2020-11-27 15:48:42	Male	2000-08-08	High School	3º	No	Yes	Aunts, uncles or other relatives	No		Yes	Yes	Yes	I don´t know	I don´t know	I don´t know	I don´t know	I don´t know	I don´t know	No	I don´t know	I don´t know	I don´t know	5	1	2	2	3	5	5	2	4	4	5	5	0	5	3	5	5	5	4	5	5	5	4	5	4	3	3
2020-11-27 15:48:48	Male	2000-04-24	High School	3º	Yes	No		Yes	Parent or grandparents, Close friend	Yes	Yes	Yes	Yes	Yes	Yes	Yes	Yes	Yes	Yes	Yes	Yes	Yes	5	2	4	3	1	1	3	0	4	4	3	5	4	3	2	5	4	4	3	4	4	5	4	5	2	1	1
2020-11-27 15:48:55	Female	2000-04-07	High School	3º	Yes	Yes	Close friend	Yes	Parent or grandparents, Aunts, uncles or other relatives	Yes	Yes	Yes	I don´t know	Yes	Yes	Yes	Yes	Yes	Yes	Yes	Yes	Yes	5	3	0	2	2		5	5	5	5	5	5	5	5	2	5	5	5	5	5	5	5	5	5	5	0	2
2020-11-27 15:49:35	Female	2000-11-22	High School	3º	Yes	Yes	Aunts, uncles or other relatives	Yes	Parent or grandparents, Aunts, uncles or other relatives	Yes	Yes	I don´t know	Yes	Yes	Yes	No	Yes	Yes	No	Yes	Yes	I don´t know	5	0	5	4	3	4	4	4	5	3	3	5	4	3	3	4	4	4	4	3	3	4	4	3	4	1	1
2020-11-27 15:49:37	Male	2000-10-12	High School	3º	Yes	No		No		Yes	Yes	Yes	I don´t know	Yes	Yes	Yes	I don´t know	Yes	No	I don´t know	Yes	Yes	5	3	0	0	3	3	4	5	5	4	4	5	4	3	2	4	5	5	5	4	4	5	4	5	4	3	3
2020-11-27 15:50:22	Female	2000-12-19	High School	3º	Yes	No		Yes	Parent or grandparents	Yes	I don´t know	I don´t know	I don´t know	Yes	Yes	Yes	I don´t know	Yes	I don´t know	Yes	Yes	Yes	5	1	4	4	0	4	3	3	4	3	3	4	1			4	4	4	4	3	4	3	3	4	4	3	2
2020-11-27 15:50:26	Male	1999-09-28	High School	3º	Yes	Yes	Close friend	Yes	Parent or grandparents, Hermano/a, Close friend	Yes	I don´t know	No	Yes	Yes	Yes	Yes	I don´t know	Yes	Yes	Yes	Yes	I don´t know	5	2	4	3	0	1	3	0	2	3	2	1	3	4	3	4	5	5	5	5	5	4	4	4	3	2	2
2020-11-27 15:50:36	Male	1997-06-21	Professional training	3º	Yes	Yes	Aunts, uncles or other relatives	Yes	Parent or grandparents, Aunts, uncles or other relatives	Yes	Yes	Yes	I don´t know	Yes	Yes	Yes	No	Yes	Yes	Yes	Yes	Yes	5	2	4	3	3	5	0	0	3	4	2	5	5	3	4	5	5	4	3	4	1	2	4	5	4	2	3
2020-11-27 15:50:37	Female	2000-02-05	High School	3º	Yes	No		Yes	Parent or grandparents	Yes	Yes	I don´t know	Yes	Yes	Yes	Yes	Yes	Yes	Yes	Yes	Yes	Yes	5	4	3	4	4	5	4	4	5	4	5	5	5	4	4	5	5	5	5	4	4	5	3	5	4	3	4
2020-11-27 15:51:09	Male	2000-06-22	High School	3º	No	No		Yes	Parent or grandparents	Yes	Yes	I don´t know	I don´t know	I don´t know	Yes	I don´t know	I don´t know	I don´t know	I don´t know	Yes	No	I don´t know	4	3	2	3	3	5	4	3	4	4	2	4	3	3	3	5	5	5	4	4	4	4	3	4	4	4	4
2020-11-27 15:51:12	Male	2000-08-24	High School	3º	Yes	Yes	Aunts, uncles or other relatives	Yes	Parent or grandparents, Tíos o resto de familiares	Yes	I don´t know	I don´t know	Yes	Yes	Yes	No	Yes	Yes	Yes	Yes	Yes	Yes	5	0	5	4	3	4	4	0	5	5	5	4	5	4	4	5	4	4	4	1	1	5	1	5	4	1	0
2020-11-27 15:51:29	Female	2000-09-03	High School	3º	No	Yes	Close friend	Yes	Brother	Yes	Yes	Yes	Yes	Yes	Yes	Yes	No	Yes	Yes	Yes	Yes	Yes	5	4	4	4	4	5		5	5	5	5	5	4	4	4	4	5	5	4	4	4	4	3	5	5	3	3
2020-11-27 15:51:36	Female	1997-08-03	Professional training	3º	Yes	No		Yes	Parent or grandparents, Aunts, uncles or other relatives	Yes	I don´t know	I don´t know	I don´t know	Yes	Yes	I don´t know	Yes	Yes	Yes	I don´t know	Yes	I don´t know	5	1	2	3	2	3	4	0	5	1	4	5	5	3	4	2	2	2	5	4	5	3	5	5	4	0	0
2020-11-27 15:51:49	Female	2000-09-01	High School	3º	Yes	No		Yes	Aunts, uncles or other relatives	Yes	Yes	Yes		Yes	Yes	Yes	Yes	Yes	Yes	Yes	Yes	Yes	5	3	3	2	3	3	3	2	3	3	3	4	4	3	2	3	3	2	4	3	3		3	5	3	3	2
2020-11-27 15:52:05	Male	2000-03-06	High School	3º	Yes	No		Yes	Parent or grandparents	Yes	I don´t know	I don´t know	I don´t know	Yes	Yes	Yes	Yes	Yes	Yes	Yes	Yes	Yes	5	4	3	3	4	5	4	3	5	3	4	5	5	5	4	5	4	4	3	3	3	4	4	5	4	5	5
2020-11-27 15:52:06	Male	2000-04-18	High School	3º	Yes	No		Yes	Parent or grandparents, Tíos o resto de familiares	Yes	Yes	Yes	Yes	Yes	Yes	Yes	Yes	Yes	Yes	Yes	Yes	Yes	5	2	2	2	2	4	4	4	5	4	3	5	3	3	4	2	3	4	3	4	4	4	2	5	3	3	0
2020-11-27 15:52:09	Male	1999-08-17	Other degree or equivalent studies	3º	Yes	Yes	Close friend	Yes	Parent or grandparents, Hermano/a, Aunts, uncles or other relatives	Yes	Yes	Yes	Yes	Yes			No	Yes		Yes	Yes	Yes	5	0	5	5	1	1	5	1	5	5	5	5	1	5	3	5	5	5	5	5	5	5	4	5	3	1	2
2020-11-27 15:52:11	Female	2000-09-09	High School	3º	Yes	Yes	Parent or grandparents	Yes	Parent or grandparents, Hermano/a, Aunts, uncles or other relatives	Yes	Yes	Yes	Yes	Yes	I don´t know	I don´t know	I don´t know	Yes	Yes	Yes	Yes	Yes	5	1	4	1	1	4	4	4	4	4	4	4	1	3	2	4	4	4	2	2	2	5	2	5	4	4	3
2020-11-27 15:54:17	Female	2000-01-08	High School	3º	Yes	Yes	Close friend	Yes	Parent or grandparents, Close friend	Yes	Yes	Yes	I don´t know	I don´t know	Yes	I don´t know	I don´t know	Yes	Yes	Yes	Yes	Yes	5	4	4		2	3	3	3	4	3	4	4	4	4	3	4	3	4	4	4	3	4	4	4	4	4	3
2020-11-27 16:10:02	Male	2000-05-20	High School	3º	Yes	Yes	Aunts, uncles or other relatives	Yes	Parent or grandparents, Close friend	Yes	Yes	Yes	I don´t know	Yes	Yes	No	No	Yes	Yes	Yes	Yes	Yes	5	5	0	0	3	4	3	3	3	3
2020-11-27 16:11:59	Female	1998-08-05	High School	4º	Yes	Yes	Close friend	Yes	Parent or grandparents, Hermano/a, Aunts, uncles or other relatives	Yes	Yes	Yes	I don´t know	I don´t know	I don´t know	I don´t know	I don´t know	I don´t know	I don´t know	I don´t know	I don´t know	I don´t know	5	5	3	1	0	5	4	5	4	4
2020-11-27 20:15:16	Female	1999-03-22	High School	3º	Yes	Yes	Close friend	Yes	Aunts, uncles or other relatives	Yes	Yes	Yes	Yes	Yes	Yes	Yes	Yes	I don´t know	Yes	Yes	Yes	Yes	5	2	1	3	2	3	4	2	4	3	3	4	4	4	4	4	4	3	4	3	4	3	4	3	2	4	2
2020-12-02 13:44:42	Female	1999-04-19	High School	2º	Yes	Yes	Close friend	Yes	Parent or grandparents, Hermano/a, Aunts, uncles or other relatives	Yes	Yes	Yes	I don´t know	Yes	Yes	Yes	Yes	Yes	Yes	Yes	Yes	Yes	5	3	2	4	1	2	3	2	4	4	4	5	4	4	3	4	4	4	4			3	4	5	5	0	1
2020-12-17 14:50:25	Female	2000-02-12	Other degree or equivalent studies	3º	Yes	No		Yes	Parent or grandparents	Yes	Yes	Yes	Yes	Yes	Yes	I don´t know	Yes	Yes	Yes	Yes	I don´t know	Yes	5	3	2	1	2	1	3	0	3	3	4	5	3	1	3	4	3	4	3	4	4	5	4	4	3	3	2
2020-12-18 10:20:21	Female	1988-12-18	Professional training	3º	Yes	Yes	Close friend	No		Yes	Yes	I don´t know	I don´t know	Yes	Yes	Yes	Yes	Yes	No	I don´t know	Yes	Yes	5	1	4	5	1	4	3	1	4	4	5	5	5	3	4	5	5	5	4	4	5	4	4	4	3	3	2
[truncated: 16 more columns]
